# Supplementary material
Source: Springer Nature journal article supplement (https://www.springermedizin.de/resource/supplementary/12885_2012_3803_MOESM4_ESM.pdf/9464428)
Supplement: MOESM4 [file 9464428]

A

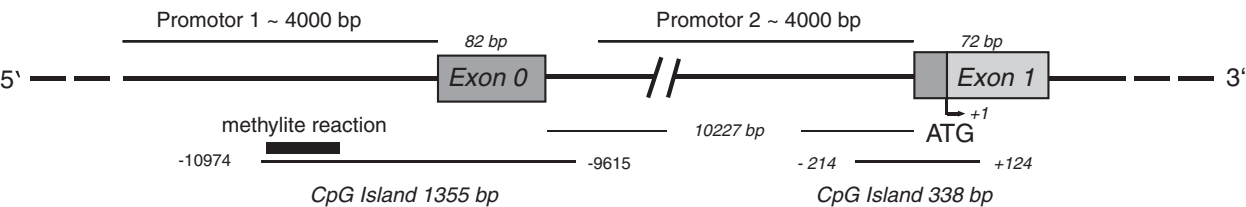

Primer localisation

product size

CpG sides

B

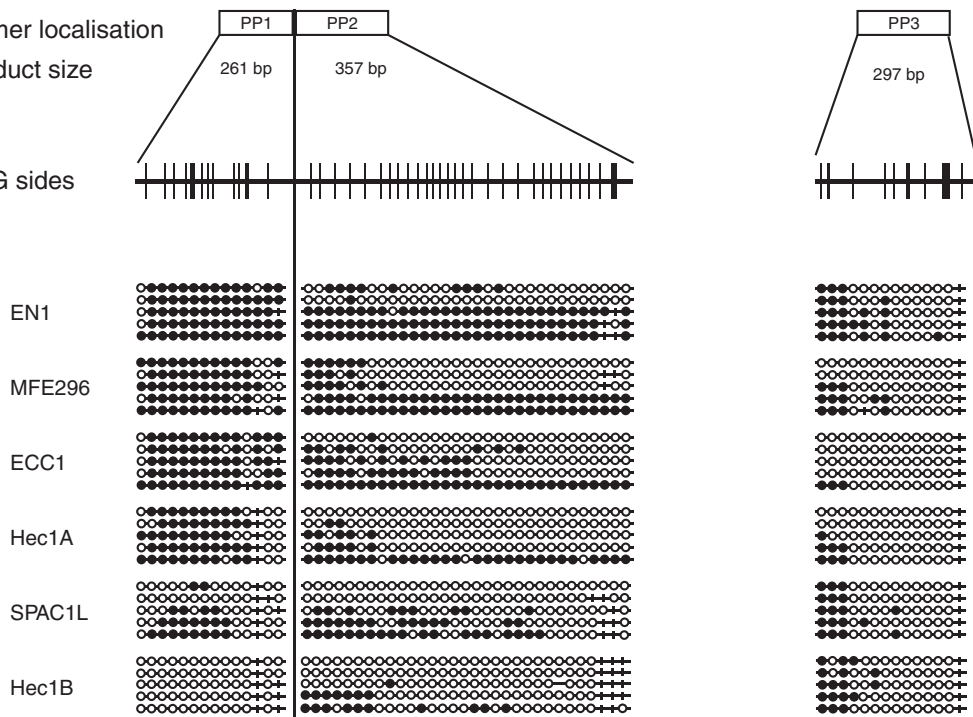

○ unmethylated CpG site

● methylated CpG site

| not detected CpG site
